1

2 *Prepared for Biorxiv submission 8<sup>th</sup> October 2019*

3

4 **An experimentally-derived measure of inter-replicate variation in reference samples:**  
5 **the same-same permutation methodology**

6

7 **David C. Handler and Paul A. Haynes\***

8

9 Department of Molecular Sciences, Macquarie University, North Ryde, NSW 2109,  
10 Australia

11

12 Email - david.handler@mq.edu.au

13 Email - paul.haynes@mq.edu.au

14

15 \* Correspondence: Professor Paul A. Haynes, Department of Molecular Sciences,  
16 Macquarie University, North Ryde, NSW 2109, Australia

17 Phone: 61-2-9850 6258

18 Fax: 61-2-9850 6200

19 Email - paul.haynes@mq.edu.au

20

21

22

23

24

25 **Abstract**

26 The multiple testing problem is a well-known statistical stumbling block in high-  
27 throughput data analysis, where large scale repetition of statistical methods introduces  
28 unwanted noise into the results. While approaches exist to overcome the multiple testing  
29 problem, these methods focus on theoretical statistical clarification rather than incorporating  
30 experimentally-derived measures to ensure appropriately tailored analysis parameters. Here,  
31 we introduce a method for estimating inter-replicate variability in reference samples for a  
32 quantitative proteomics experiment using permutation analysis. This can function as a  
33 modulator to multiple testing corrections such as the Benjamini-Hochberg ordered Q value  
34 test. We refer to this as a ‘same-same’ analysis, since this method incorporates the use of six  
35 biological replicates of the reference sample and determines, through non-redundant triplet  
36 pairwise comparisons, the level of quantitative noise inherent within the system. The method  
37 can be used to produce an experiment-specific Q value cut-off that achieves a specified false  
38 discovery rate at the quantitation level, such as 1%. The same-same method is applicable to  
39 any experimental set that incorporates six replicates of a reference sample. To facilitate  
40 access to this approach, we have developed a same-same analysis R module that is freely  
41 available and ready to use via the internet.

42

43 **Keywords:** Label-free shotgun proteomics, false discovery rates, data quality, data  
44 validation, statistics

45

46

47

48

49

## 50 **1. Introduction**

51

52 Shotgun proteomics experiments that seek to compare ‘reference’ and ‘treated’ states of  
53 a given sample will often contain thousands of individual comparisons, each requiring  
54 statistical validation. In such circumstances, repeated use of the Student’s t-test will  
55 invariably introduce false discoveries into the results. A Student’s t-test with a significance  
56 cut-off threshold P value of 0.05 produces 95% confidence i.e. 5% of tests will have an equal  
57 likelihood to be attributable to chance instead of experimental factors [1-4]. This is a follow-  
58 on conclusion from the probability that at least one test in an experiment will be significant,  
59 which is described as  $1 - (1 - \alpha)^k$ , where  $\alpha$  is the significance cut-off and k is the number of  
60 tests conducted [5].

61 Multiple Testing Corrections (MTCs) were introduced to help address this limitation [6],  
62 including the use of Q values rather than P values [7], Bonferroni correction [8,9], Benjamini-  
63 Hochberg (BH) adjusted t-test [10], Bonferroni-Holm test [11], and the Benjamini-Yoav  
64 (BY) test [12]. MTCs, however, are often overly conservative and increase the false negative  
65 rate by eliminating otherwise valid protein identifications. This is especially a problem at the  
66 protein-quantitation level; MTCs, by their nature, contribute to a lessening of the protein  
67 quantitation false discovery rate (PQ-FDR) at the expense of otherwise valid protein  
68 identifications [13,14]. In the context of this article, PQ-FDR is defined as false discoveries  
69 arising from comparative quantitative proteomics calculations between one or more samples.  
70 There is always a balance to be struck between stringency and accuracy when controlling  
71 false discoveries at the protein quantitation level [15]. A recent study in this area applied  
72 Bayesian statistics to great effect, detecting a greater number of relevant protein quantitation  
73 changes in previously published data sets [16]. There are also numerous software packages  
74 available which incorporate various other MTC approaches, including Proteus [17], DAPAR

75 and ProStaR [18], MSqRob [19], UbiA-MS [20], ProteoSign [21], msVolcano [22], FDRtool  
76 [23], MSstats [24], and limma [25].

77 Although the use of MTC correction methods in the proteomics field is not standardized  
78 [9,26-28], MTCs are an important tool that researchers can employ for extracting the best  
79 results from their dataset i.e. finding the balance between reducing noise without losing  
80 signal. This desire to reduce the noise in the system led us to ask the question: is there a better  
81 way to quantify variability between replicate analyses of a reference sample ?

82 One established approach for assessing variability across a sample set is to use  
83 permutation analysis, based upon the Significance Analysis of Micro-array (SAM)  
84 permutation methodology [29,30]. This is a similar theoretical framework to that used for  
85 permutation analysis within Perseus [31], a well-established data analysis program in the  
86 MaxQuant environment [32]. The SAM permutation analysis method assigns a score to each  
87 gene on the basis of change in gene expression relative to the standard deviation of repeated  
88 measurements. SAM then uses redundant permutations of repeated measurements to estimate  
89 the percentage of genes identified by chance, which is used to calculate the false discovery  
90 rate. The permutations are performed across all of the ‘reference’ and ‘treated’ sample  
91 replicates within a given experimental data set. Those genes with scores higher than the  
92 specified threshold are deemed potentially significant, and the threshold can be adjusted to  
93 identify smaller or larger sets of genes, with FDR calculated for each set.

94 The same – same method introduced in this study, in contrast, employs non-redundant  
95 permutations of experimentally repeated measurements of protein abundance in replicate  
96 analysis of a defined reference sample. The permutations are performed on data from the  
97 reference samples only, isolated from the ‘treated’ samples This is used to generate a single  
98 average Q value indicative of the degree of variation of abundance across the reference  
99 sample replicates. Proteins which reach a defined statistical significance threshold are  
100 deemed to be false discoveries at the protein quantitation level, since comparing a reference

101 sample against itself should theoretically yield no changes in protein abundance. It is  
102 important to emphasize that the underlying assumption is that the biological variability  
103 between reference samples is zero, so this approach is accounting for the technical variability.  
104 This facilitates subsequent assessment of induced biological variation between reference  
105 samples and treated samples.

106 A specified false discovery rate in the same – same analysis of replicates of the reference  
107 sample is used to generate a Q value threshold, and that value can then be carried forward to  
108 the subsequent analysis of a reference sample versus ‘treated’ sample within the same larger  
109 experimental data set. One of main the applications of this method for determining an  
110 experimentally-derived measure of reference sample variability is that it can subsequently be  
111 used to modify an existing MTC protocol for downstream analysis, thus minimising the PQ-  
112 FDR without introducing false negatives. By performing a specific permutation analysis to  
113 measure the variability inherent within reference sample replicates, we can produce an  
114 experimentally modulated Q value threshold for use with MTCs when comparing the  
115 reference sample to treated samples. In essence, rather than using a default Q value of .05, or  
116 choosing a more stringent value, we are employing a Q value threshold that is experimentally  
117 determined for each set of samples analyzed. The same-same method represents another tool  
118 in the proteomics toolbox, and can be used to enable the extraction of additional biological  
119 knowledge from large-scale datasets.

120

121

## 122 **2. Materials and Methods**

123

### 124 ***2.1 Label free quantitative proteomics data sets***

125 To demonstrate the utility of the sam-same approach we reanalyzed two sets of previously  
126 published label free quantitative shotgun proteomics data. Protein identification and  
127 Normalized Spectral Abundance Factor (NSAF) values [33,34] were sourced from

128 previously published studies from our laboratory on cultured Cabernet Sauvignon grape cells  
129 grown at different temperatures [35] (ProteomeXchange identifier PXD000977) and leaf  
130 tissue of IAC1131 rice plants exposed to drought stress [36] (ProteomeXchange identifier  
131 PXD004096). The cultured Cabernet Sauvignon grape cell data consists of six biological  
132 replicates of cell cultures maintained at 26°C, as the optimum, or control, temperature, and  
133 biological triplicate analysis of cells maintained at 18°C and 10°C as moderate and extreme  
134 cold stress conditions, and 34°C and 42°C as moderate and extreme heat stress conditions.  
135 The rice leaf data consists of two sets of three biological replicates each of unstressed plants  
136 as controls, and biological triplicate analysis of plants exposed to moderate drought stress,  
137 extreme drought stress, and extreme drought stress followed by recovery.

## 138 *2.2 Same – same permutation analysis of reference samples*

139 For analysis using the same-same workflow, six replicates of a reference sample are run  
140 through a PSM (peptide-to-spectrum matching) engine and protein identification lists are  
141 exported as csv files. Next, these six replicates are grouped into two sets of triplicates by the  
142 use of inner joins (dummy state ‘control’, dummy state ‘treatment’), and a test array is formed  
143 through a full join of the states [37]. One hundred Student’s t-tests are conducted on each  
144 identified protein comparison with significance cut-off values from 0.01 to 1, stepped at 0.01  
145 intervals. All proteins found at different quantitation levels are considered false discoveries,  
146 since comparison between two data sets of the same sample type would theoretically give  
147 identical quantitation with no observed changes. This process is repeated for all ten  
148 combinations of non-redundant triplet pairs that six replicates can form. The MTC analysis  
149 then begins by iterating over this 10x t-test array and applying one of five user-specified  
150 MTC methods (BH, Benjamini-Yoav, Bonferroni, Hommel [38], and Bioconductor Q [39]).  
151 The program then averages the MTC test results from all arrays examined, and reports the  
152 point at which the significance cut-off corresponds to a user-specified PQ-FDR.

153 The same-same methodology is automated through an R script. Source code is available  
154 from <https://bitbucket.org/peptidewitch/samesame/>, and a freely accessible working web  
155 version can be found at <https://peptidewitch.shinyapps.io/samesame>. The R Shiny web-app  
156 provides three distinct outputs from the same-same analysis:

157 1) A series of Q value vs FDR bar plots (x axis 0.01 to 1, stepped at 0.01) from all ten  
158 triplet paired combinations,

159 2) A series of P value histograms of these same combinations, and,

160 3) A numerical value that corresponds to the user-specified MTC cut-off that produces  
161 the desired PQ-FDR (default 1%).

162 Input data types are not constrained to spectral counts, as in theory any data type that  
163 consists of protein identifications coupled with abundance or intensity value measurements  
164 can be used. However, the first generation of the analysis tool was designed and tested using  
165 spectral counting-based data, so it is recommended that spectral counts or spectral abundance  
166 factors be used initially.

### 167 ***2.3 Perseus permutation analysis of reference samples***

168 To serve as a comparison against the same-same process, the same NSAF data from both  
169 Grape and Rice samples as above were reanalyzed using Perseus software [31]. Spreadsheet  
170 files containing NSAF values for each set of samples were uploaded to Perseus through a  
171 generic matrix upload. Using the two-sample module, we applied the Perseus permutation  
172 method as a form of truncation using ungrouped (no grouping preserved), 250-count  
173 permutation analysis on two-tailed Student's t-testing arrays with BH correction, comparing  
174 six reference replicates with three replicates from each of the 'treated' sample states, with the  
175 specified FDR thresholds ranging from 1-5%.

176

177

178

179

### 180 3. Results

181

182 The following section details how same-same approach was applied to the published data  
183 from Grape and Rice cells. Figure 1 displays the outputs described above for the same-same  
184 analysis conducted on the grape cell culture label-free data when specifying BH correction  
185 and 1% PQ-FDR. The end-point of the same-same process is the modulated Q value, in this  
186 example 0.054 (Figure 1C), produced from averaging the threshold values in Figure 1A at  
187 the desired PQ-FDR value. This value can be used for downstream analysis on subsequent  
188 control vs treatment samples as a modulator for the chosen MTC.

189 Figure 2 presents the subsequent downstream analysis of the grape cell cultures grown at  
190 different temperatures. Figure 2A shows the number of proteins found to be significantly  
191 differentially expressed in terms of protein fold change when compare the set of six reference  
192 replicates to the set of three replicates of cells grown at each temperature. These are analysed  
193 using different statistical measures of significance: P values of 0.05 and 0.01 for a student's  
194 t-test, BH Q value of 0.05, and BH using the same-same derived Q value (SS-Q), and  
195 specifying PQ – FDR of 1%, 2% or 3%. It is evident that the same-same derived Q values at  
196 1% PQ-FDR produce results very similar to the use of default BH Q values, which is expected  
197 given that the SS-Q value used is very close to the 0.05 BH-Q value threshold. The two  
198 approaches give similar results, although it is noticeable that at a specified PQ – FDR of 3%,  
199 the comparison with the largest effect size (Figure 2E) shows significantly more differentially  
200 expressed proteins.

201

202



203

**Figure 1**

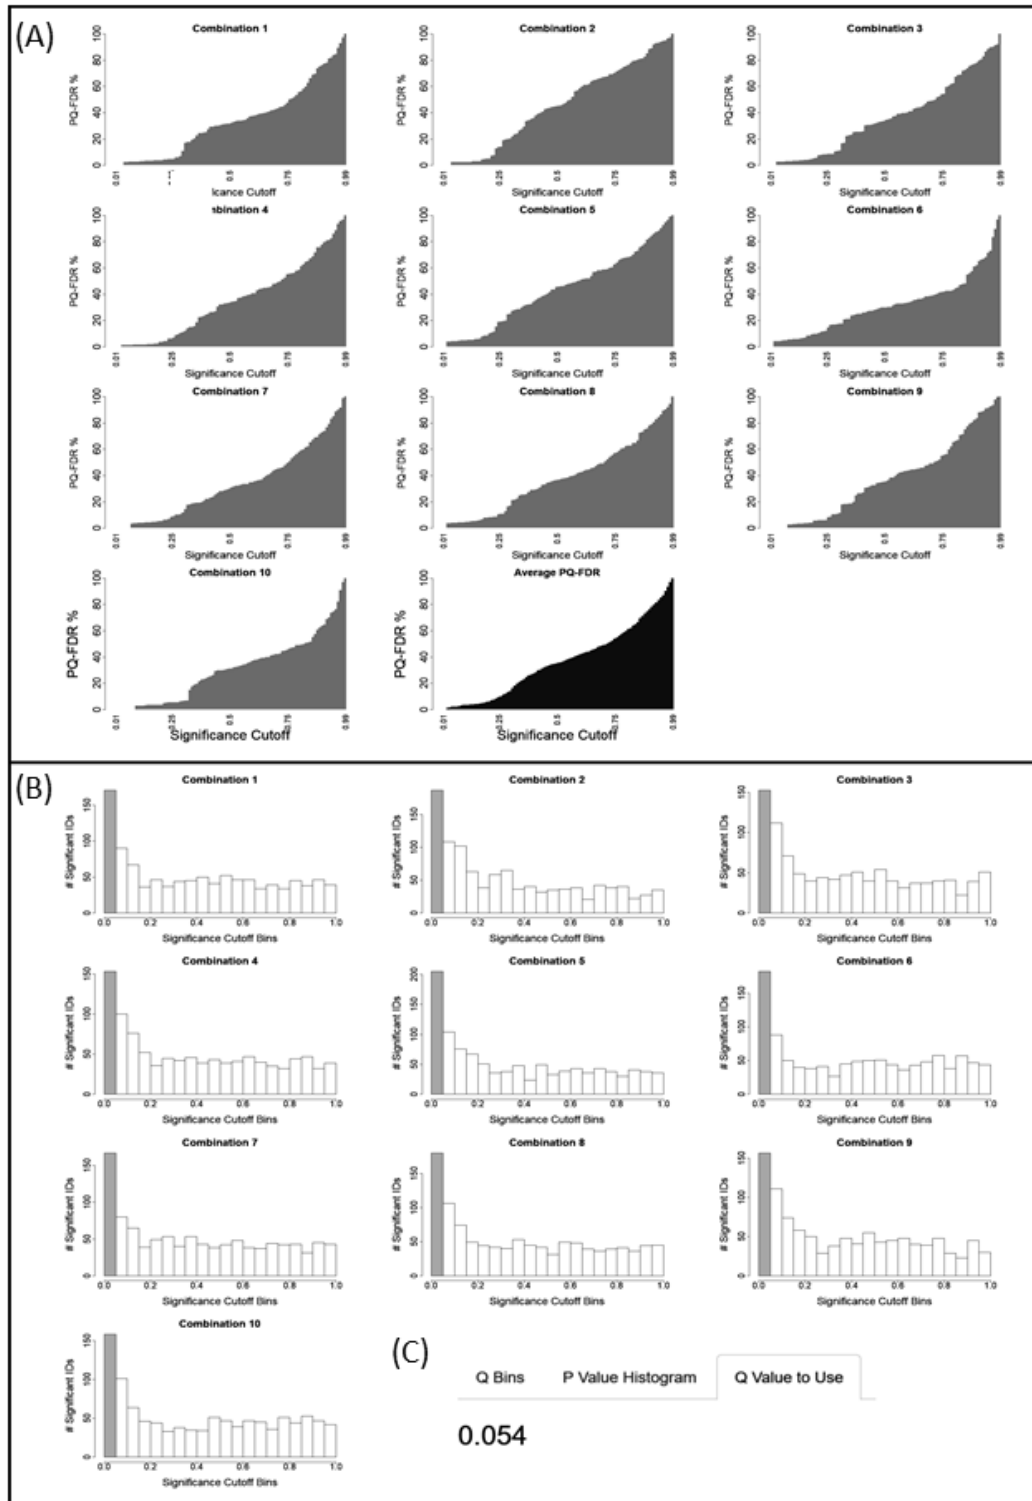

204

205

206

207 **Figure 2**

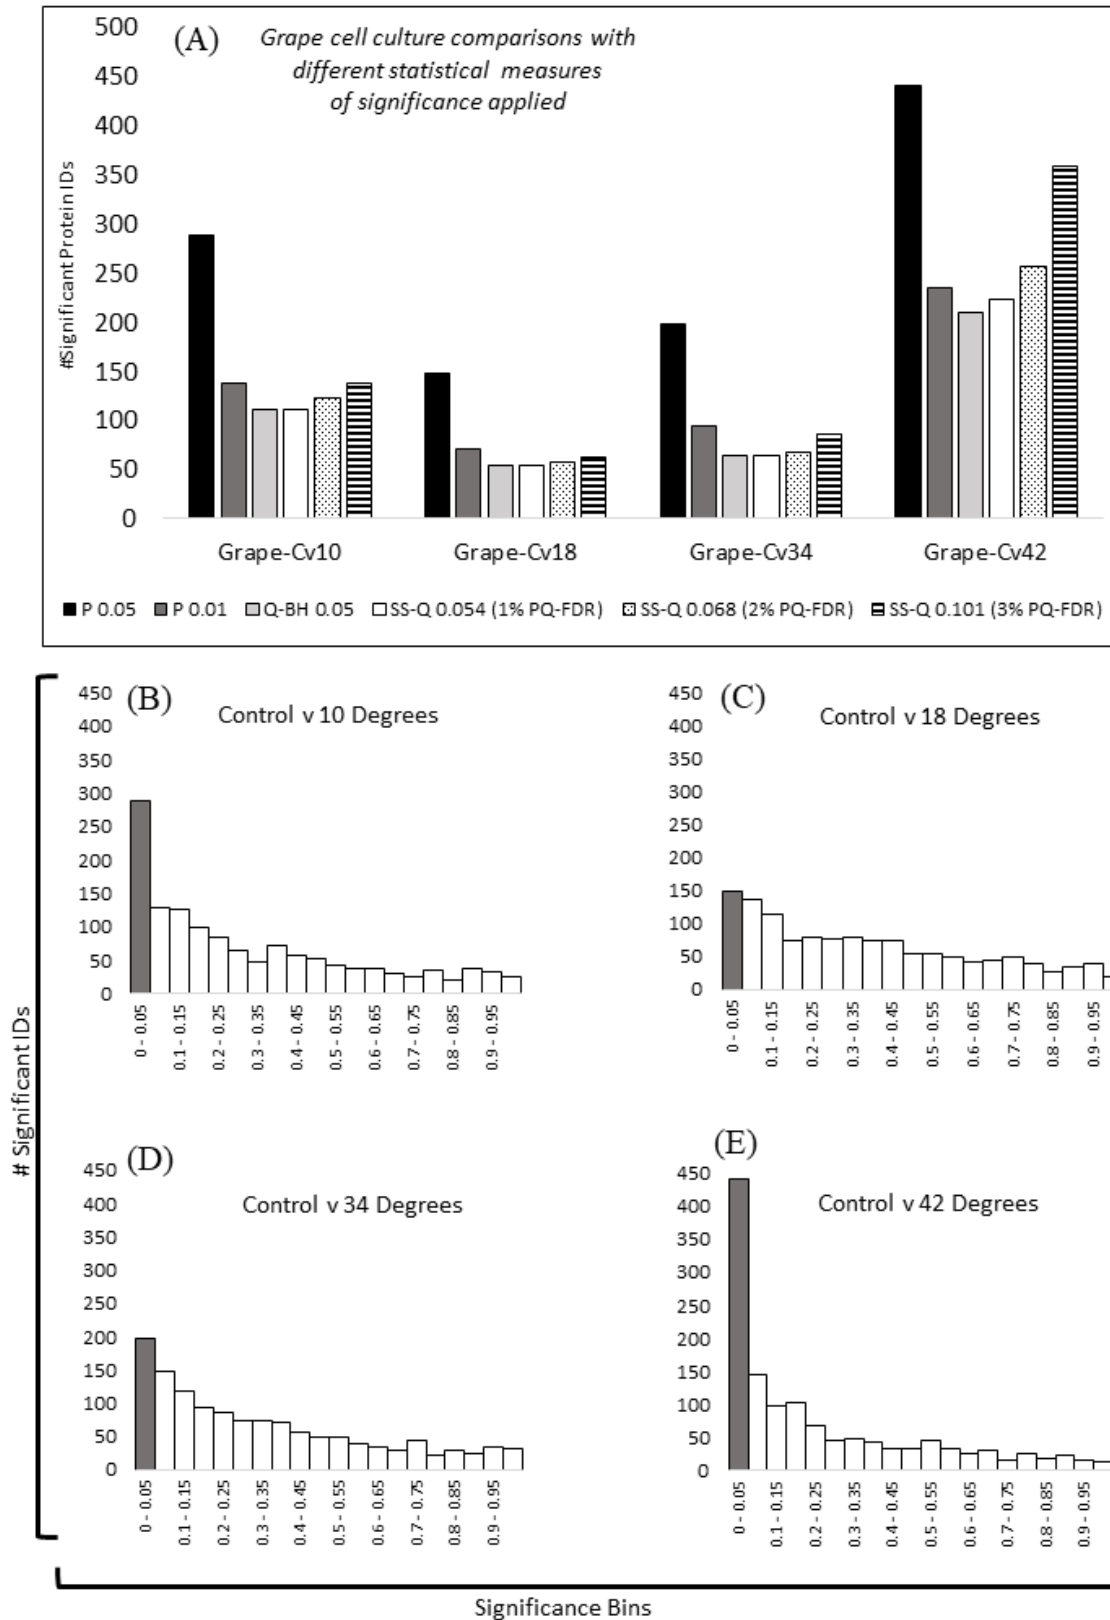

208

209

210 Figure 3 presents the same type of analyses as shown in Figure 1 for the data derived  
211 from comparative analysis of leaf tissue from IAC1131 rice plants exposed to different levels  
212 of drought stress. Interestingly, in contrast to figure 2, it is clear that in this case there is a  
213 direct correlation between observed effect size and number of differentially expressed  
214 proteins identified using the SS-Q approach. In comparisons with greater effect size as  
215 observed in P value histograms (Figure 3E,3F,3G), the same-same derived Q Values are able  
216 to identify a greater number of differentially expressed proteins than were found using the  
217 default BH Q value, and at 3% PQ-FDR are approaching the number of differentially  
218 expressed proteins found using uncorrected P values.

219 Table 1 presents the results of analyzing the grape and rice cell NSAF data referred to  
220 above using different analysis approaches, including Student t-tests with and without BH  
221 correction, application of same – same derived Q values to a BH corrected t-test at specified  
222 PQ-FDR values ranging from 1% to 5%, and t-tests using Perseus permutations at specified  
223 PQ-FDR values ranging from 1% to 5%. The table shows the number of proteins which are  
224 reported to be significantly differentially expressed when comparing the reference samples  
225 against the grape cells grown at four different temperatures, and the rice cells grown under  
226 three different watering regimes. It is clear from these comparisons that, as expected, the  
227 uncorrected student's t-test gives a much greater number than any sort of correction. The BH  
228 correction reduces the number of significant proteins by approximately 95%. The Perseus  
229 permutation processing is even more strict and, for example, produces zero significant  
230 identifiers in more than half of the grape sample comparisons. In contrast, the same-same-

231 modulated BH test is able to detect significantly differentially regulated proteins for every  
 232 test case for both tissue types while always remaining well below the results reported from  
 233 uncorrected Student's t-testing P values. Multiple testing correction still takes place, but the  
 234 experimentally derived Q value thresholds allow for the recovery of a greater number of  
 235 significant differences at the protein quantitation level.

236

237

238 **Table 1 – Comparison of number of protein identifications retained using different**  
 239 **analysis approaches to assess protein quantitation false discovery rate**

| Comparisons   | t-test <sup>a</sup> |    | Perseus permutations BH |    |    |    |    | Same-Same BH |     |     |     |     |
|---------------|---------------------|----|-------------------------|----|----|----|----|--------------|-----|-----|-----|-----|
|               | .05                 | BH | 1% <sup>b</sup>         | 2% | 3% | 4% | 5% | 1%           | 2%  | 3%  | 4%  | 5%  |
| <b>Grape</b>  |                     |    |                         |    |    |    |    |              |     |     |     |     |
| Cont vs 10 C  | 735                 | 42 | 0                       | 0  | 0  | 0  | 0  | 48           | 54  | 72  | 91  | 99  |
| Cont vs 18 C  | 560                 | 29 | 0                       | 0  | 0  | 9  | 9  | 29           | 34  | 43  | 51  | 65  |
| Cont vs 34 C  | 432                 | 21 | 0                       | 0  | 0  | 0  | 6  | 24           | 28  | 36  | 42  | 48  |
| Cont vs 42 C  | 775                 | 83 | 0                       | 0  | 0  | 0  | 44 | 108          | 116 | 133 | 166 | 199 |
| <b>Rice</b>   |                     |    |                         |    |    |    |    |              |     |     |     |     |
| Cont vs Ext   | 543                 | 12 | 0                       | 0  | 0  | 0  | 0  | 15           | 16  | 17  | 17  | 17  |
| Cont vs Mod   | 481                 | 13 | 0                       | 0  | 0  | 0  | 0  | 13           | 17  | 20  | 20  | 20  |
| Cont vs Recov | 568                 | 21 | 0                       | 0  | 0  | 0  | 0  | 22           | 33  | 40  | 40  | 40  |

240 <sup>a</sup> .05 = standard 2-sample t-test, BH = Benjamin-Hochberg corrected 2 sample t-test

241 <sup>b</sup> protein quantitation false discovery rate assessed at 1% -5% using the approaches indicated

242

243

244

245

**Figure 3**

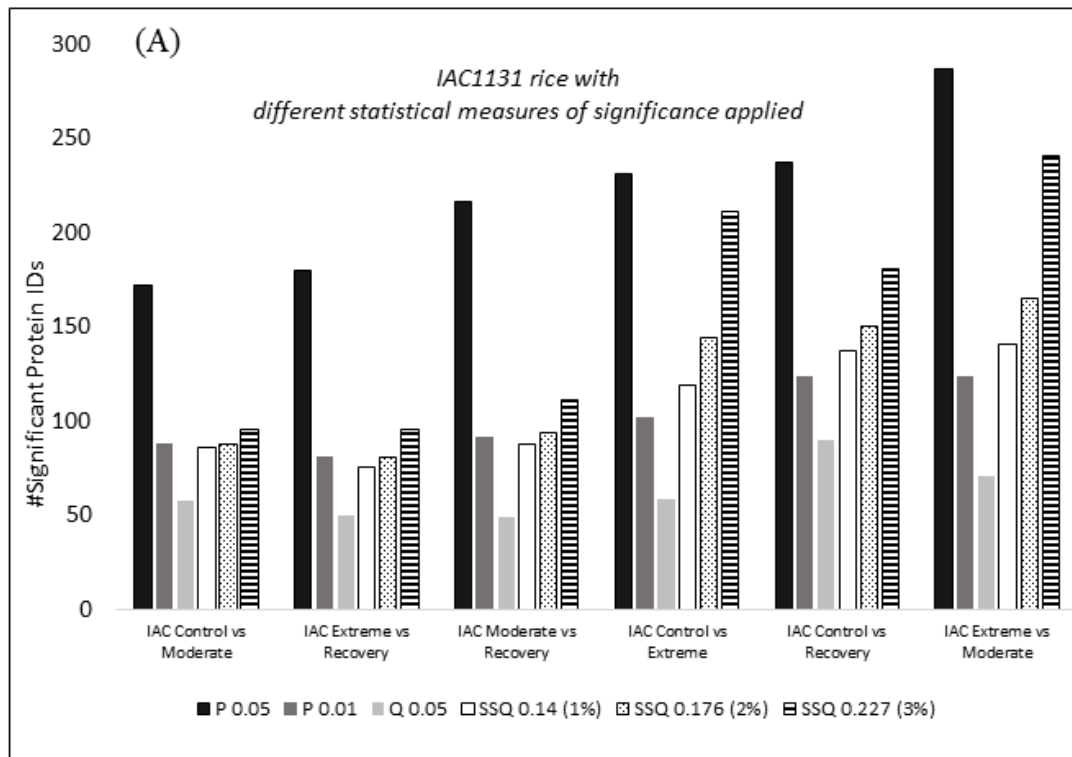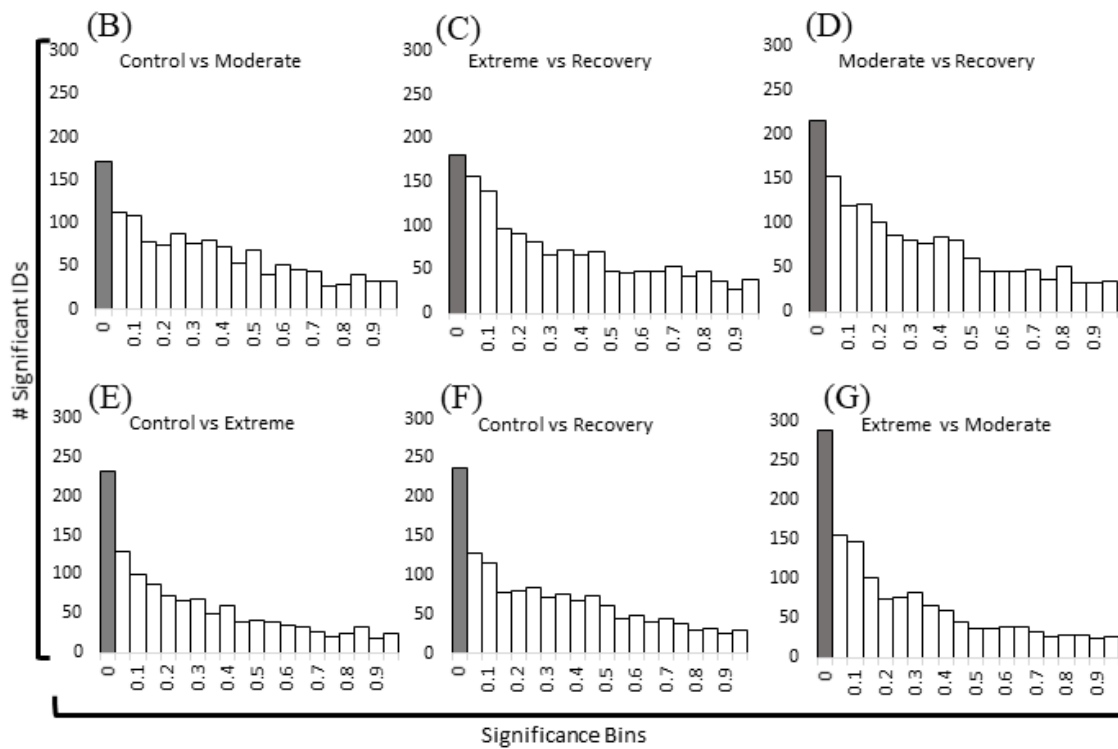

246

247

248

249

#### 4. Discussion

250

251

252

253

254

255

256

257

258

259

260

261

262

263

264

265

266

267

268

269

270

271

272

273

274

The correlation observed between effect size and number of differentially expressed proteins found in the dataset presented in Figure 3 has also been found in numerous other datasets we have analysed. In general, SS-Q values are generally better suited to those datasets that show a larger effect size. This may be due to the fact that not all quantitatively different proteins in a small effect sample are false positives, or may be a consequence of NSAFs overstating expression change ratios for protein identifications based on lower spectral counts, which can help to increase the effect size [4]. While the use of higher Q value thresholds raises the implicit question of whether or not the dataset contains too much noise, it is important to remember why the same-same experiment is conducted in the first place. If, in an experiment where we expect there to be minimal noise, we demonstrate that there is a SS-Q threshold value that produces 1% PQ-FDR between sets of control or reference replicates, then in a closely related experiment with the same reference sample using the same threshold value, we can infer experimentally that the specified PQ-FDR has been achieved.

It is important to stress, however, that this method is suited more towards initial discovery, and that follow-up experimentation must employ orthogonal validation protocols. In order to obtain an experimentally-derived PQ-FDR of 1%, or other specified value, the same-same method is a very useful tool, because inferring the PQ-FDR based on the Q value cut-off alone does not yield corresponding PQ-FDR levels (i.e. a Q value of 0.05 does not specifically produce either 5% or 1% PQ-FDR). Modifying the MTC significance value cut-off so that it takes into account the experimental variability inherent within the replicates helps to produce a more tailored list of differentially expressed protein identifications whilst controlling for PQ-FDR. Also, compounding the same-same technique with another method of filtering, such as fold change cut-offs, can reduce the number of false positives included in the final dataset, further reducing the PQ-FDR [30,31].

275 In this research article, we have demonstrated a revised method for statistical analysis for  
276 shotgun proteomics datasets. The same-same method facilitates the construction of post  
277 analysis P value histograms and aids the researcher in choosing an appropriate statistical  
278 testing protocol for their analysis. We have shown that in the right circumstances, using BH  
279 Q value cut-offs derived from the same-same analysis yields a set of results that provide more  
280 significantly differentially expressed proteins from a given dataset, while also determining  
281 PQ-FDR at the experimental level. In the future, we hope to expand on this methodology so  
282 that it can be applied equally well to other quantitative proteomics data types, and also  
283 develop new tests to build onto the existing same-same architecture to further improve the  
284 statistical rigour for all shotgun proteomics results.

285

286 -----||-----

287

## 288 **5. Acknowledgments**

289 The authors acknowledge support from BioPlatforms Australia through the Australian  
290 Government's National Collaborative Research Infrastructure Scheme, and the Australian  
291 Research Council through Discovery Project DP190103140. The authors declare no conflict  
292 of interest.

293

## 294 **6. Author contributions**

295 DCH and PAH contributed equally to the conceptualization and design of this study.  
296 DCH was responsible for writing the software described. DCH prepared the original draft  
297 of the manuscript, and PAH was responsible for revision and editing.

298

## 299 **7. Figure Legends**

300 **Figure 1.** Screenshots from the same/same shiny apps module  
301 (<https://peptidewitch.shinyapps.io/SameSame>), using the grape cell control samples and  
302 specifying BH correction at 1% PQ-FDR. (A) Q value vs PQ-FDR bar plots (x axis 0.01 to  
303 1, stepped at 0.01) for all ten triplet paired permutations generated from six replicate analyses  
304 of a reference sample (see Figure 1) (B) P value histograms for each permutation, showing  
305 number of significantly expressed protein identifications sorted into P values bins in  
306 increments of 0.05. (C) displays a single numerical value which produces the desired PQ-  
307 FDR value (default BH at 1%, can be user specified).

308 **Figure 2.** Grape cell culture comparisons with application of different statistical  
309 significance measures. Cells grown at 26°C were designated as the reference sample, and  
310 compared with cells grown at 18°C (moderate cold), 10°C (extreme cold), 34°C (moderate



311 heat), and 42°C (extreme heat). Panel A displays the number of significantly differentially  
312 expressed protein identifications found for each comparison using P values at .05 and .01,  
313 Benjamini-Hochberg adjusted values at 0.05, and BH using the same-same derived Q value  
314 (SS-Q), and specifying PQ – FDR of 1%, 2% or 3%. Panels B to E contain P value histograms  
315 showing the number of significantly expressed protein identifications sorted into P value bins  
316 in increments of 0.05, for each of the four experimental comparisons performed, as indicated.

317 **Figure 3.** IAC1131 rice samples drought stress comparisons with application of different  
318 statistical significance measures. Control plants were unstressed, and compared with plants  
319 exposed to moderate drought stress, extreme drought stress, or extreme drought stress  
320 followed by recovery. Panel A displays the number of significantly differentially expressed  
321 protein identifications found for each comparison using P values at .05 and .01, Benjamini-  
322 Hochberg adjusted values at 0.05, and BH using the same-same derived Q value (SS-Q), and  
323 specifying PQ – FDR of 1%, 2% or 3%. Panels B to G are P value histograms showing the  
324 number of significantly expressed protein identifications sorted into P value bins in  
325 increments of 0.05, for each of the six experimental comparisons performed, as indicated.

326

327

328

329

330

331

332

333 **8. References**

- 334 1. Colquhoun, D. An investigation of the false discovery rate and the misinterpretation  
335 of p-values. *R Soc Open Sci* **2014**, *1*, 140216.
- 336 2. Diz, A.P.; Carvajal-Rodriguez, A.; Skibinski, D.O. Multiple hypothesis testing in  
337 proteomics: A strategy for experimental work. *Mol Cell Proteomics* **2011**, *10*, M110  
338 004374.
- 339 3. Karp, N.A.; Lilley, K.S. Design and analysis issues in quantitative proteomics studies.  
340 *Proteomics* **2007**, *7* 42-50.
- 341 4. Sullivan, G.M.; Feinn, R. Using effect size-or why the p value is not enough. *J Grad*  
342 *Med Educ* **2012**, *4*, 279-282.
- 343 5. Streiner, D.L.; Norman, G.R. Correction for multiple testing: Is there a resolution?  
344 *Chest* **2011**, *140*, 16-18.
- 345 6. Bender, R.; Lange, S. Adjusting for multiple testing--when and how? *J Clin*  
346 *Epidemiol* **2001**, *54*, 343-349.
- 347 7. Armstrong, R.A. When to use the bonferroni correction. *Ophthalmic Physiol Opt*  
348 **2014**, *34*, 502-508.
- 349 8. Choi, H.; Nesvizhskii, A.I. False discovery rates and related statistical concepts in  
350 mass spectrometry-based proteomics. *J Proteome Res* **2008**, *7*, 47-50.
- 351 9. Benjamini, Y.; Hochberg, Y. Controlling the false discovery rate: A practical and  
352 powerful approach to multiple testing. *J Royal Stat Society, Series B* **1995**, 289-300.
- 353 10. Holm, S. A simple sequentially rejective multiple test procedure. *Scandinavian*  
354 *journal of statistics* **1979**, *6*, 65-70.
- 355 11. Benjamini, Y.; Yekutieli, D. The control of the false discovery rate in multiple testing  
356 under dependency. *Annals of statistics* **2001**, *29*, 1165-1188.
- 357 12. Carvajal-Rodriguez, A.; de Una-Alvarez, J. Assessing significance in high-  
358 throughput experiments by sequential goodness of fit and q-value estimation. *PLoS*  
359 *One* **2011**, *6*, e24700.
- 360 13. Pascovici, D.; Handler, D.C.; Wu, J.X.; Haynes, P.A. Multiple testing corrections in  
361 quantitative proteomics: A useful but blunt tool. *Proteomics* **2016**, *16*, 2448-2453.
- 362 14. Noble, W.S. How does multiple testing correction work? *Nat Biotechnol* **2009**, *27*,  
363 1135-1137.
- 364 15. The, M.; Kall, L. Integrated identification and quantification error probabilities for  
365 shotgun proteomics. *Mol Cell Proteomics* **2019**, *18*, 561-570.
- 366 16. Gierlinski, M.; Gastaldello, F.; Barton, G.J. Proteus: An r package for downstream  
367 analysis of maxquant output. *BioRxiv* **2018**, doi.org/doi10.1101/416511.
- 368 17. Wiczorek, S.; Combes, F.; Lazar, C.; Gianetto, Q.G.; Gatto, L.; Dorffer, A.; Hesse,  
369 A.M.; Coute, Y.; Ferro, M.; Bruley, C., *et al.* Dapar & prostar: Software to perform  
370 statistical analyses in quantitative discovery proteomics. *Bioinformatics* **2017**, *33*,  
371 135-136.
- 372 18. Goeminne, L.J.E.; Gevaert, K.; Clement, L. Experimental design and data-analysis in  
373 label-free quantitative lc/ms proteomics: A tutorial with msqrob. *J Proteomics* **2018**,  
374 *171*, 23-36.

- 375 19. Zhang, X.; Smits, A.H.; van Tilburg, G.B.; Ovaa, H.; Huber, W.; Vermeulen, M.  
376 Proteome-wide identification of ubiquitin interactions using ubia-ms. *Nat Protoc*  
377 **2018**, *13*, 530-550.
- 378 20. Efstathiou, G.; Antonakis, A.N.; Pavlopoulos, G.A.; Theodosiou, T.; Divanach, P.;  
379 Trudgian, D.C.; Thomas, B.; Papanikolaou, N.; Aivaliotis, M.; Acuto, O., *et al.*  
380 Proteosign: An end-user online differential proteomics statistical analysis platform.  
381 *Nucleic Acids Res* **2017**, *45*, W300-W306.
- 382 21. Singh, S.; Hein, M.Y.; Stewart, A.F. Msvolcano: A flexible web application for  
383 visualizing quantitative proteomics data. *Proteomics* **2016**, *16*, 2491-2494.
- 384 22. Strimmer, K. A unified approach to false discovery rate estimation. *BMC*  
385 *Bioinformatics* **2008**, *9*, 303.
- 386 23. Choi, M.; Chang, C.Y.; Clough, T.; Broudy, D.; Killeen, T.; MacLean, B.; Vitek, O.  
387 Msstats: An r package for statistical analysis of quantitative mass spectrometry-based  
388 proteomic experiments. *Bioinformatics* **2014**, *30*, 2524-2526.
- 389 24. Ritchie, M.E.; Phipson, B.; Wu, D.; Hu, Y.; Law, C.W.; Shi, W.; Smyth, G.K. Limma  
390 powers differential expression analyses for rna-sequencing and microarray studies.  
391 *Nucleic Acids Res* **2015**, *43*, e47.
- 392 25. Gelman, A.; Hill, J.; Yajima, M. Why we (usually) don't have to worry about multiple  
393 comparisons. *J Res Educ Effect* **2012**, *5*, 189-211.
- 394 26. Kall, L.; Storey, J.D.; MacCoss, M.J.; Noble, W.S. Posterior error probabilities and  
395 false discovery rates: Two sides of the same coin. *J Proteome Res* **2008**, *7*, 40-44.
- 396 27. Rothman, K.J. No adjustments are needed for multiple comparisons. *Epidemiology*  
397 **1990**, *1*, 43-46.
- 398 28. Gierlinski, M.; Cole, C.; Schofield, P.; Schurch, N.J.; Sherstnev, A.; Singh, V.;  
399 Wrobel, N.; Gharbi, K.; Simpson, G.; Owen-Hughes, T., *et al.* Statistical models for  
400 rna-seq data derived from a two-condition 48-replicate experiment. *Bioinformatics*  
401 **2015**, *31*, 3625-3630.
- 402 29. Tusher, V.G.; Tibshirani, R.; Chu, G. Significance analysis of microarrays applied to  
403 the ionizing radiation response. *Proc Natl Acad Sci U S A* **2001**, *98*, 5116-5121.
- 404 30. Tyanova, S.; Temu, T.; Sinitcyn, P.; Carlson, A.; Hein, M.Y.; Geiger, T.; Mann, M.;  
405 Cox, J. The perseus computational platform for comprehensive analysis of  
406 (prote)omics data. *Nat Methods* **2016**, *13*, 731-740.
- 407 31. Tyanova, S.; Temu, T.; Cox, J. The maxquant computational platform for mass  
408 spectrometry-based shotgun proteomics. *Nat Protoc* **2016**, *11*, 2301-2319.
- 409 32. Neilson, K.A.; Ali, N.A.; Muralidharan, S.; Mirzaei, M.; Mariani, M.; Assadourian,  
410 G.; Lee, A.; van Sluyter, S.C.; Haynes, P.A. Less label, more free: Approaches in  
411 label-free quantitative mass spectrometry. *Proteomics* **2011**, *11*, 535-553.
- 412 33. Neilson, K.A.; Keighley, T.; Pascovici, D.; Cooke, B.; Haynes, P.A. Label-free  
413 quantitative shotgun proteomics using normalized spectral abundance factors.  
414 *Methods Mol Biol* **2013**, *1002*, 205-222.
- 415 34. George, I.S.; Pascovici, D.; Mirzaei, M.; Haynes, P.A. Quantitative proteomic  
416 analysis of cabernet sauvignon grape cells exposed to thermal stresses reveals

- 417 alterations in sugar and phenylpropanoid metabolism. *Proteomics* **2015**, *15*, 3048-  
418 3060.
- 419 35. Wu, Y.; Mirzaei, M.; Pascovici, D.; Chick, J.M.; Atwell, B.J.; Haynes, P.A.  
420 Quantitative proteomic analysis of two different rice varieties reveals that drought  
421 tolerance is correlated with reduced abundance of photosynthetic machinery and  
422 increased abundance of clpd1 protease. *J Proteomics* **2016**, *143*, 73-82.
- 423 36. Mishra, P.; Eich, M. Join processing in relational databases. *CM Computing Surveys*  
424 **1992**, *24*, 63-113.
- 425 37. Hommel, G.; Krummenauer, F. Improvements and modifications of tarone's multiple  
426 test procedure for discrete data. *Biometrics* **1998**, *54*, 673-681.
- 427 38. Qian, H.R.; Huang, S. Comparison of false discovery rate methods in identifying  
428 genes with differential expression. *Genomics* **2005**, *86*, 495-503.
- 429
